# Supplementary material for: Selenium Increases Fruit Quality By Reducing Ethylene Production And The Stone Cell Content In Pear (Pyrus Ussuriensis)
Source: Research Square preprint supplement (doi:10.21203/rs.3.rs-626936/v1), 2021-06-29
Supplement: Supplementary file 1 [file 42950ad6d22bef16bac49a8f.docx]

| Primer name | Sequence (5’-3’) | Purpose |
| --- | --- | --- |
| PuACS1-ex-F | GGGCACCACAATGACCAGA | Gene Expression |
| PuACS1-ex-R | GTGAACTCGCTGCCAAAC |
| PuACS4-ex-F | TGCAGCCACAGTCTTCAGCT |
| PuACS4-ex-R | CGGCCAATGTTCACCACGTC |
| PuERF2-ex-F | GTCATGATCAGCTGCCACCT |
| PuERF2-ex-R | TAATGCTTCCCTCTCGCCAC |
| PuCOMT-ex-F | CGGCAAGGAGCGCTACGAGAGG |
| PuCOMT-ex-R | GCAGGCCAGCAGCAGGATGAAGAT |
| PuCAD-ex-F | AGCATTTGAGAGGCCTACCG |
| PuCAD-ex-R | GCCTTCTCCTTGGACACCTG |
| PuC4H-ex-F | GCGGAGTTCAGATCACAGAG |
| PuC4H-ex-R | CCACCAAGCATTCACCAGTAT |

Supplemental Table1

Primers used in this research
